# Supplementary material
Source: publisher site journal article supplement (https://www.dovepress.com/article/512916)
Supplement: Supplementary file 1 [file get_supplementary_file.php]

**Appendices:**

**Supplemental Table 1. Function related to angiogenesis and endothelium of endothelial-associated cytokines**

|  | **Biomarker** | **Function** | **Ref.** |
| --- | --- | --- | --- |
| 1 | ANGPT1 | Angiopoietin-1 (ANGPT1), a member of the angiopoietin family, is expressed in vascular smooth muscle cells. ANGPT1 stimulates angiogenesis and regulates the formation and stability of blood vessels by activating PTK2/FAK and downstream kinases signaling pathways. | 1,2 |
| 2 | CD62P | Selectin P (P-SEL, CD62P) is stored in the α granules of platelets and the Wibel-Palade bodies of endothelial cells and mediates the interaction of activated endothelial cells or platelets with white blood cells. Soluble Selectin P is present in plasma and may originate primarily from vascular endothelial cells. | 3,4 |
| 3 | MMP1 | MMP1 is a member of the peptidase M10 family of matrix metalloproteinases (MMPs). MMP1 promotes angiogenesis by degrading extracellular matrix (ECM) during initial angiogenesis and wound healing. | 5 |
| 4 | SDC1 | Syndecan-1 (SDC1) is a heparan sulfate proteoglycan that is present in the glycocalyx of vascular endothelial cells and is essential for maintaining the stability and function of blood vessels. | 6,7 |
| 5 | PECAM1 | Platelet endothelial cell adhesion molecule-1 (PECAM1, CD31) is a type I transmembrane glycoprotein that belongs to the immunoglobulin superfamily and is highly expressed in all vascular endothelial cells. It participates in leuco-endothelial and endothelium-endothelial interactions, mediates intercellular adhesion through homogeneous and heterogeneous interactions, and transduces intracellular signals that regulate the function of denectin on leukocytes. | 8,9 |
| 6 | VEGFA | Vascular endothelial growth factor A (VEGFA), a member of the vascular endothelial growth factor family, acts through binding with its receptor VEGFR2 to promote endothelial cell proliferation, migration, survival and the formation of new blood vessels. | 10,11 |
| 7 | VLA-4 | Very late antigen-4 (integrin α4ß1, VLA-4), a member of the integrin family of immune cell adhesion receptors, plays an important role in mediating the adhesion of immune cells (such as lymphocytes and monocytes) to the vascular endothelium and migration to the site of inflammation. | 12,13 |
| 8 | CD62E | Selectin E (E-SEL, CD62E) is an adhesion molecule specifically expressed in vascular endothelial cells, mainly on the surface of activated endothelial cells. By regulating the microfilament skeleton recombination of endothelial cells, a low-impedance region is formed, thereby enhancing the transendothelial migration of white blood cells. | 14–16 |
| 9 | TM | Thrombomodulin (TM) is a transmembrane glycoprotein mainly present on the surface of vascular endothelial cells. Knocking out of TM leads to increased basal permeability and hyperpermeability of endothelial cells, affecting endothelial barrier function. | 17 |
| 10 | VEGFR2 | Vascular endothelial growth factor receptor-2 (VEGFR2) is a transmembrane tyrosine kinase receptor expressed in vascular endothelial cells, which promotes the formation of new blood vessels and regulates vascular permeability by binding to members of the VEGF family. | 18 |
| 11 | VEGFR3 | Vascular endothelial growth factor receptor-3 (VEGFR3) mainly exists in lymphatic endothelial cells. VEGFR3 has a high affinity with VEGFC and VEGFD, and is involved in the formation of lymphatic vessels. VEGFR3 promotes the endothelial proliferation and migration by activating downstream signaling pathways such as PI3K/AKT and MAPK. | 19 |
| 12 | VEGFD | Vascular endothelial growth factor D (VEGFD) binds to VEGFR2 and VEGFR3 to promote the proliferation and migration of vascular endothelial cells, thus participating in angiogenesis. | 20,21 |

**References:**

1. Li Y, Liu P, Zhou Y, et al. Activation of Angiopoietin-Tie2 Signaling Protects the Kidney from Ischemic Injury by Modulation of Endothelial-Specific Pathways. *J Am Soc Nephrol*. 2023;34(6):969-987. doi:10.1681/ASN.0000000000000098

2. Papapetropoulos A, Fulton D, Mahboubi K, et al. Angiopoietin-1 Inhibits Endothelial Cell Apoptosis via the Akt/Survivin Pathway. *J Biol Chem*. 2000;275(13):9102-9105. doi:10.1074/jbc.275.13.9102

3. Setiadi H, Yago T, Liu Z, McEver RP. Endothelial signaling by neutrophil-released oncostatin M enhances P-selectin-dependent inflammation and thrombosis. *Blood Adv*. 2019;3(2):168-183. doi:10.1182/bloodadvances.2018026294

4. Bhargavan B, Kanmogne GD. SARS-CoV-2 Spike Proteins and Cell-Cell Communication Induce P-Selectin and Markers of Endothelial Injury, NETosis, and Inflammation in Human Lung Microvascular Endothelial Cells and Neutrophils: Implications for the Pathogenesis of COVID-19 Coagulopathy. *Int J Mol Sci*. 2023;24(16):12585. doi:10.3390/ijms241612585

5. Rundhaug JE. Matrix metalloproteinases and angiogenesis. *J Cell Mol Med*. 2005;9(2):267-285. doi:10.1111/j.1582-4934.2005.tb00355.x

6. Baucom MR, Weissman N, Price AD, et al. Syndecan-1 as the Effect or Effector of the Endothelial Inflammatory Response? *J Surg Res*. 2024;295:611-618. doi:10.1016/j.jss.2023.10.010

7. Kusuzawa K, Suzuki K, Okada H, et al. Measuring the Concentration of Serum Syndecan-1 to Assess Vascular Endothelial Glycocalyx Injury During Hemodialysis. *Front Med*. 2021;8:791309. doi:10.3389/fmed.2021.791309

8. DeLisser HM, Baldwin HS, Albelda SM. Platelet Endothelial Cell Adhesion Molecule 1 (PECAM-1/CD31): A Multifunctional Vascular Cell Adhesion Molecule. *Trends Cardiovasc Med*. 1997;7(6):203-210. doi:10.1016/S1050-1738(97)00049-2

9. Bruggisser J, Tarek B, Wyder M, et al. CD31 (PECAM-1) Serves as the Endothelial Cell-Specific Receptor of Clostridium perfringens β-Toxin. *Cell Host Microbe*. 2020;28(1):69-78.e6. doi:10.1016/j.chom.2020.05.003

10. Gleadle JM, Ratcliffe PJ. Induction of Hypoxia-Inducible Factor-1, Erythropoietin, Vascular Endothelial Growth Factor, and Glucose Transporter-1 by Hypoxia: Evidence Against a Regulatory Role for Src Kinase. *Blood*. 1997;89(2):503-509. doi:10.1182/blood.V89.2.503

11. Abhinand CS, Raju R, Soumya SJ, Arya PS, Sudhakaran PR. VEGF-A/VEGFR2 signaling network in endothelial cells relevant to angiogenesis. *J Cell Commun Signal*. 2016;10(4):347-354. doi:10.1007/s12079-016-0352-8

12. Lin C, Zhang Y, Zhang K, et al. Fever Promotes T Lymphocyte Trafficking via a Thermal Sensory Pathway Involving Heat Shock Protein 90 and α4 Integrins. *Immunity*. 2019;50(1):137-151.e6. doi:10.1016/j.immuni.2018.11.013

13. Weninger W, Biro M, Jain R. Leukocyte migration in the interstitial space of non-lymphoid organs. *Nat Rev Immunol*. 2014;14(4):232-246. doi:10.1038/nri3641

14. Somers WS, Tang J, Shaw GD, Camphausen RT. Insights into the Molecular Basis of Leukocyte Tethering and Rolling Revealed by Structures of P- and E-Selectin Bound to SLeX and PSGL-1. *Cell*. 2000;103(3):467-479. doi:10.1016/S0092-8674(00)00138-0

15. Wagers A, Lowe J, Kansas G. An important role for the alpha 1,3 fucosyltransferase, FucT-VII, in leukocyte adhesion to E-selectin. *Blood*. 1996;88(6):2125-2132. doi:10.1182/blood.V88.6.2125.bloodjournal8862125

16. Oh IY, Yoon CH, Hur J, et al. Involvement of E-selectin in recruitment of endothelial progenitor cells and angiogenesis in ischemic muscle. *Blood*. 2007;110(12):3891-3899. doi:10.1182/blood-2006-10-048991

17. Weisel JW, Nagaswami C, Young TA, Light DR. The Shape of Thrombomodulin and Interactions with Thrombin as Determined by Electron Microscopy. *J Biol Chem*. 1996;271(49):31485-31490. doi:10.1074/jbc.271.49.31485

18. Nathan JR, Shika S, Ragunathan M. 185 Vascular endothelial growth factor receptor-2 ( *VEGFR2* ): structure and functional relationship. *J Biomol Struct Dyn*. 2013;31(sup1):119-119. doi:10.1080/07391102.2013.786427

19. Tammela T, Zarkada G, Wallgard E, et al. Blocking VEGFR-3 suppresses angiogenic sprouting and vascular network formation. *Nature*. 2008;454(7204):656-660. doi:10.1038/nature07083

20. Achen MG, Jeltsch M, Kukk E, et al. Vascular endothelial growth factor D (VEGF-D) is a ligand for the tyrosine kinases VEGF receptor 2 (Flk1) and VEGF receptor 3 (Flt4). *Proc Natl Acad Sci*. 1998;95(2):548-553. doi:10.1073/pnas.95.2.548

21. Nilsson I, Bahram F, Li X, et al. VEGF receptor 2/-3 heterodimers detected in situ by proximity ligation on angiogenic sprouts. *EMBO J*. 2010;29(8):1377-1388. doi:10.1038/emboj.2010.30

| **Supplemental Table 2: Lower and Upper Limit of Detection (LLD, ULD, ng/mL), the intra-assay %CV and the percentage of measurements within the specified range from LLD to ULD for the 16 vascular transformation blood biomarkers.** | | | | |
| --- | --- | --- | --- | --- |
| **Biomarkers1** | **fitting range, ng/ml (LLD, ULD)** | **intra-assay CV %** | **Beyond range %** | **Within range %** |
| ANGPT1 | 55.87, 126979 | <10 | 11.7 | 88.3 |
| CD62E | 136.79, 2418967 | <5 | 0 | 100 |
| MMP1 | 3.38, 28040 | <10 | 0 | 100 |
| PECAM1 | 199.47, 2192359 | <5 | 0 | 100 |
| CD62P | 230.78, 4032519 | <15 | 6 | 94 |
| SDC1 | 1.67, 137793 | <10 | 0 | 100 |
| TM | 10.61, 168396 | <10 | 0 | 100 |
| VEGFA | 2.70, 154380 | <10 | 0 | 100 |
| VEGFD | 0.13, 18471 | <10 | 0 | 100 |
| VEGFR2 | 12.70, 861117 | <15 | 0 | 100 |
| VEGFR3 | 672.70, 4830728 | <10 | 0 | 100 |
| VLA-4 | 15.84, 1084922 | <10 | 0 | 100 |
|  |  |  |  |  |
| 1 Endothelial Injury Marker 12plex Human ProcartaPlex™ Panel,  Cat: EPX120-15849-901. LLD and ULD were determined in quality control of the kits for standard points achieving 80-120% of back calculated observed versus expected levels on 4pl fit curve, giving the valid assay range.  Intra-assay CV: The Coefficient of Variation of standard curve replicates at each dilution level. | | | | |

**Supplemental Table 3.** **The impact of medications on selected markers in patients with IgAN and non-IgAN**

|  | **IgAN** | **Non-IgAN** | ***P* value** |
| --- | --- | --- | --- |
| **Without Mycophenolate mofetil** | | | |
| **N** | 18 | 28 |  |
| **Age, year** | 44.39 ± 6.86 | 40.89 ± 13.54 | 0.317 |
| **eGFR, ml/min per 1.73m2** | 83.06 [52.70, 98.91] | 108.66 [63.60, 115.36] | 0.156 |
| **24h UTP, g/d** | 0.73 [0.27, 1.14] | 1.35 [0.44, 4.38] | 0.095 |
| **VLA-4, ng/ml** | 3855.72 ± 1008.68 | 1279.02 ± 1275.91 | <0.001 |
| **VEGFD, ng/ml** | 152.12 ± 35.57 | 59.40 ± 53.27 | <0.001 |
| **Without Glucocorticoid** | | | |
| **N** | 18 | 16 |  |
| **Age, year** | 44.39 (6.86) | 43.62 (10.83) | 0.805 |
| **eGFR, ml/min per 1.73m2** | 83.06 [52.70, 98.91] | 102.57 [47.65, 112.35] | 0.471 |
| **24h UTP, g/d** | 0.73 [0.27, 1.14] | 4.34 [2.47, 4.85] | <0.001 |
| **VLA-4, ng/ml** | 3855.72 ± 1008.68 | 1256.03 ± 1049.16 | <0.001 |
| **VEGFD, ng/ml** | 152.12 ± 35.57 | 59.41 ± 47.54 | <0.001 |
| **With Hydroxychloroquine** | | | |
| **N** | 10 | 9 |  |
| **Age, year** | 44.10 (7.42) | 34.44 (7.80) | 0.013 |
| **eGFR, ml/min per 1.73m2** | 76.00 [60.76, 96.79] | 76.47 [66.15, 97.29] | 0.929 |
| **24h UTP, g/d** | 0.79 [0.42, 1.16] | 1.11 [0.35, 2.35] | 0.462 |
| **VLA-4, ng/ml** | 3638.40 ± 913.63 | 538.70 ± 267.16 | <0.001 |
| **VEGFD, ng/ml** | 149.12 ± 35.10 | 26.94 ± 16.76 | <0.001 |
| **Without Tacrolimus** | | | |
| **N** | 18 | 26 |  |
| **Age, year** | 44.39 ± 6.86 | 39.62 ± 14.23 | 0.195 |
| **eGFR, ml/min per 1.73m2** | 83.06 [52.70, 98.91] | 91.35 [51.75, 115.17] | 0.554 |
| **24h UTP, g/d** | 0.73 [0.27, 1.14] | 1.54 [0.65, 4.33] | 0.038 |
| **VLA-4, ng/ml** | 3855.72 ± 1008.68 | 999.60 ± 1126.18 | <0.001 |
| **VEGFD, ng/ml** | 152.12 ± 35.57 | 45.28 ± 46.80 | <0.001 |
